# Supplementary material for: An omics-based machine learning approach to predict diabetes progression: a RHAPSODY study
Source: PubMed Central journal article supplement (PMC10954972; doi:10.1007/s00125-024-06105-8), 2024-02-19
Supplement: 125_2024_6105_MOESM1_ESM.pdf [file 125_2024_6105_MOESM1_ESM.pdf]

## Supplemental figures

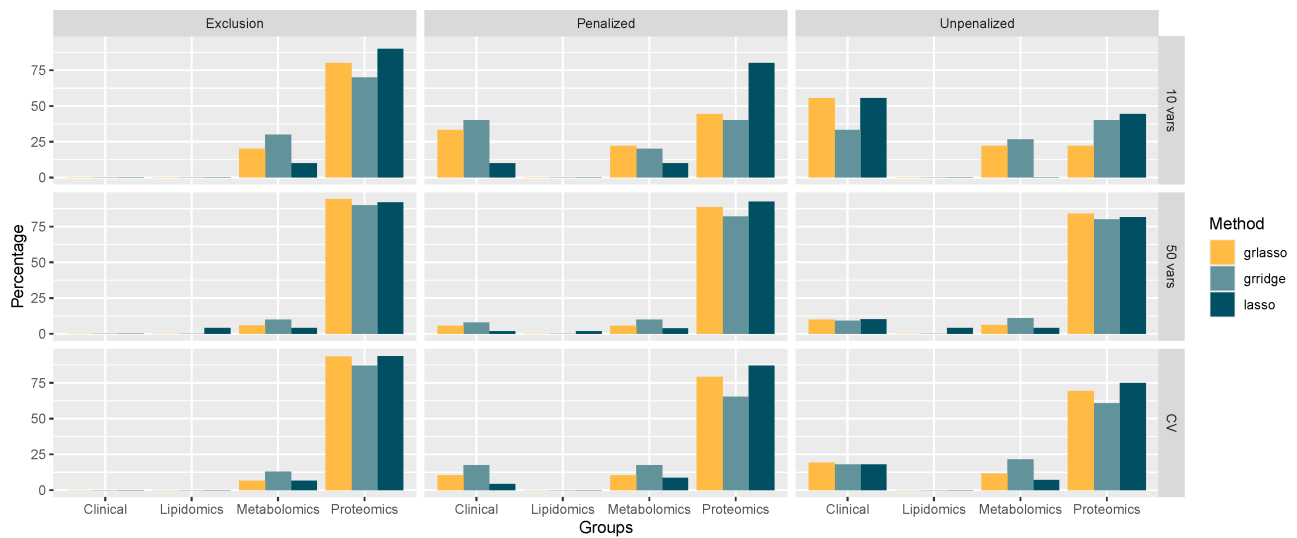

**ESM Figure 1. Types of variables selected expressed as percentage of the total number of variables selected.** Panels represent the inclusion of clinical variables (exclusion, penalised and unpenalised) and the number of variables selected (10, 50, CV). Colours are the three different methods tested (GRlasso, GRridge, lasso)

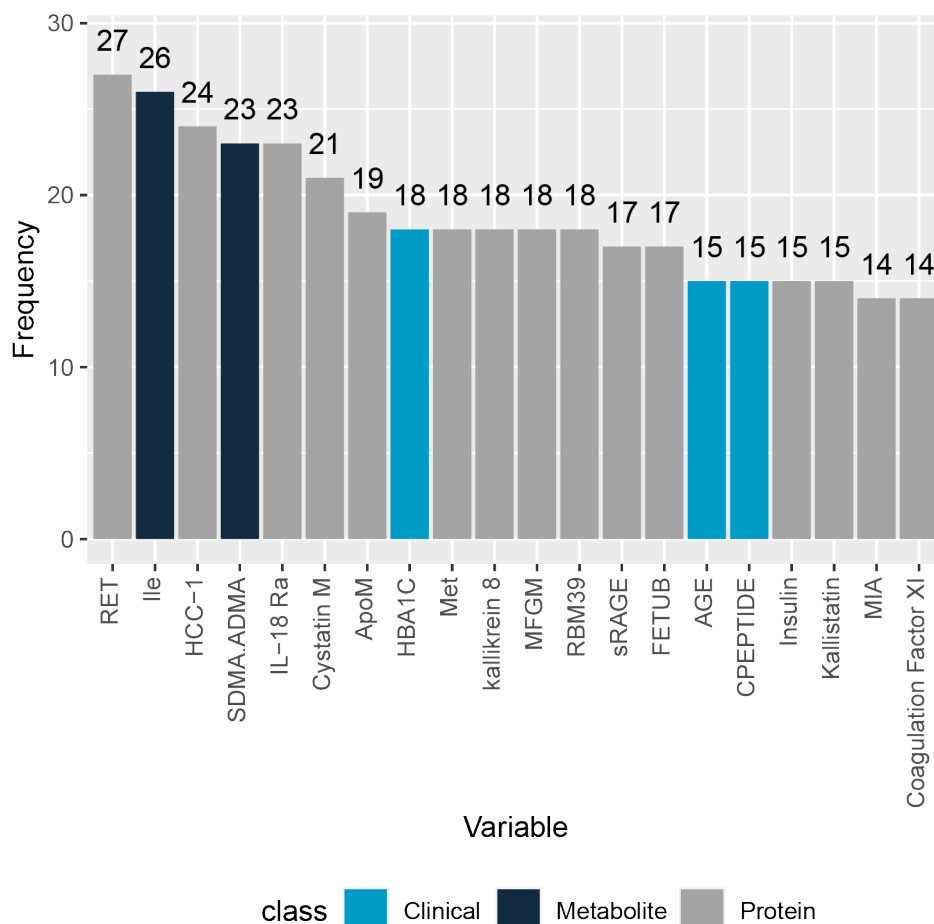

**ESM Figure 2. Frequency of selected features across models**

Unpenalized models (~10 variables)

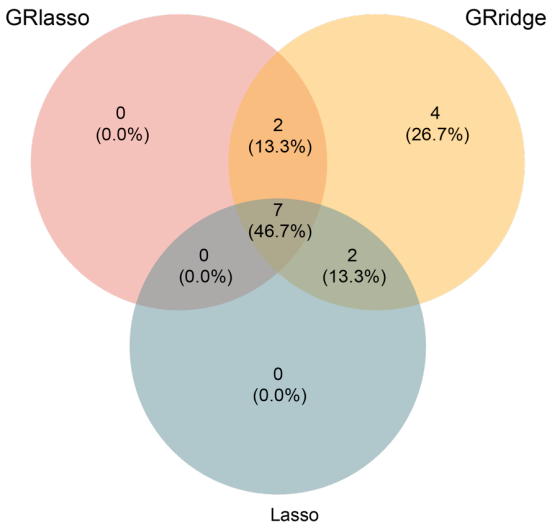

**ESM Figure 3. Overlap of the selected variables in the unpenalized models using lasso, GRridge and GRlasso.**

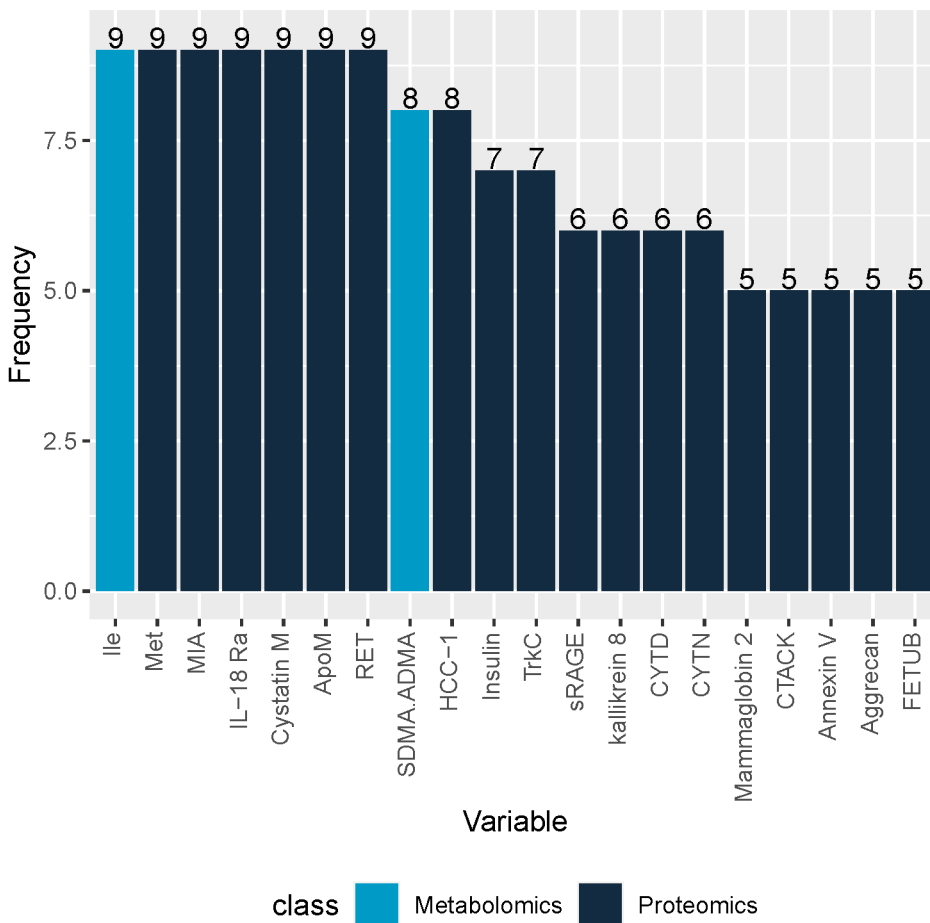

**ESM Figure 4. Frequency of variables in the models that excluded the clinical variables.**

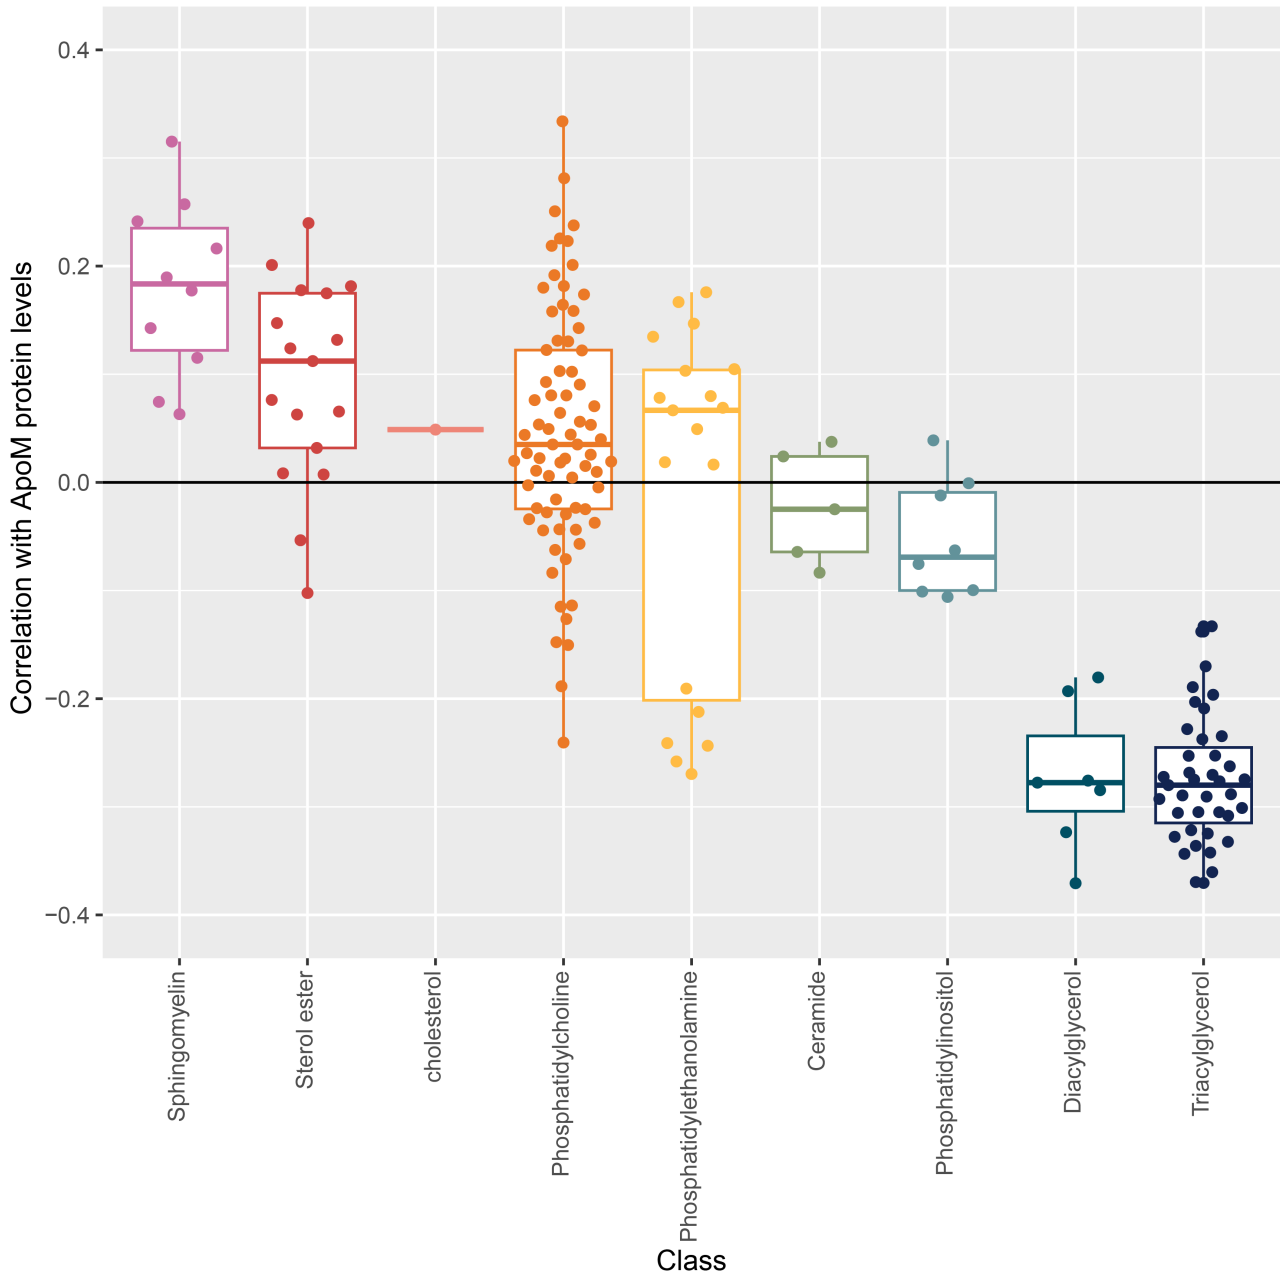

**ESM Figure 5. Correlation between plasma ApoM protein levels and plasma lipid levels.** X-axis, lipid classes, y-axis correlation with ApoM protein levels and individual lipids. Each dot represents an individual lipid within that class.
